# Supplementary material for: Fcγ receptor binding is required for maximal immunostimulation by CD70-Fc
Source: PubMed Central journal article supplement (PMC10641686; doi:10.3389/fimmu.2023.1252274), 2023-10-27
Supplement: DataSheet_1.pdf [file DataSheet_1.pdf]

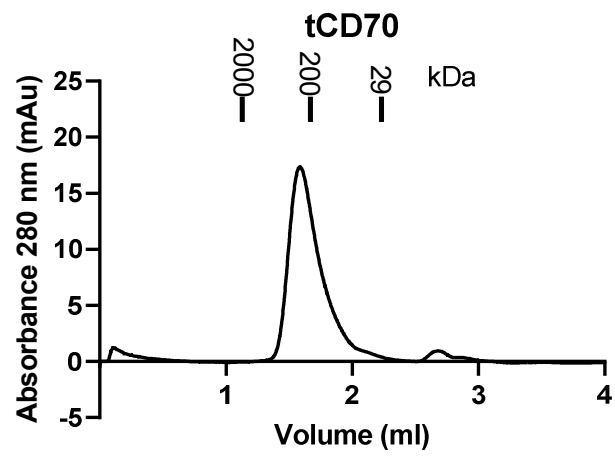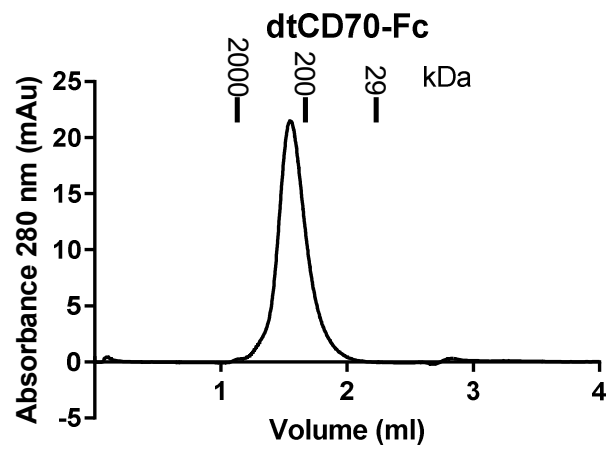

**SUPPLEMENTARY FIGURE 1.** Analytical SEC elution profiles of soluble CD70 fusion proteins (10  $\mu$ g) obtained using a Superdex 200 5/150 GL size-exclusion column and PBS as an elution buffer.
