# Supplementary material for: Fcγ receptor binding is required for maximal immunostimulation by CD70-Fc
Source: PubMed Central journal article supplement (PMC10641686; doi:10.3389/fimmu.2023.1252274), 2023-10-27
Supplement: DataSheet_2.pdf [file DataSheet_2.pdf]

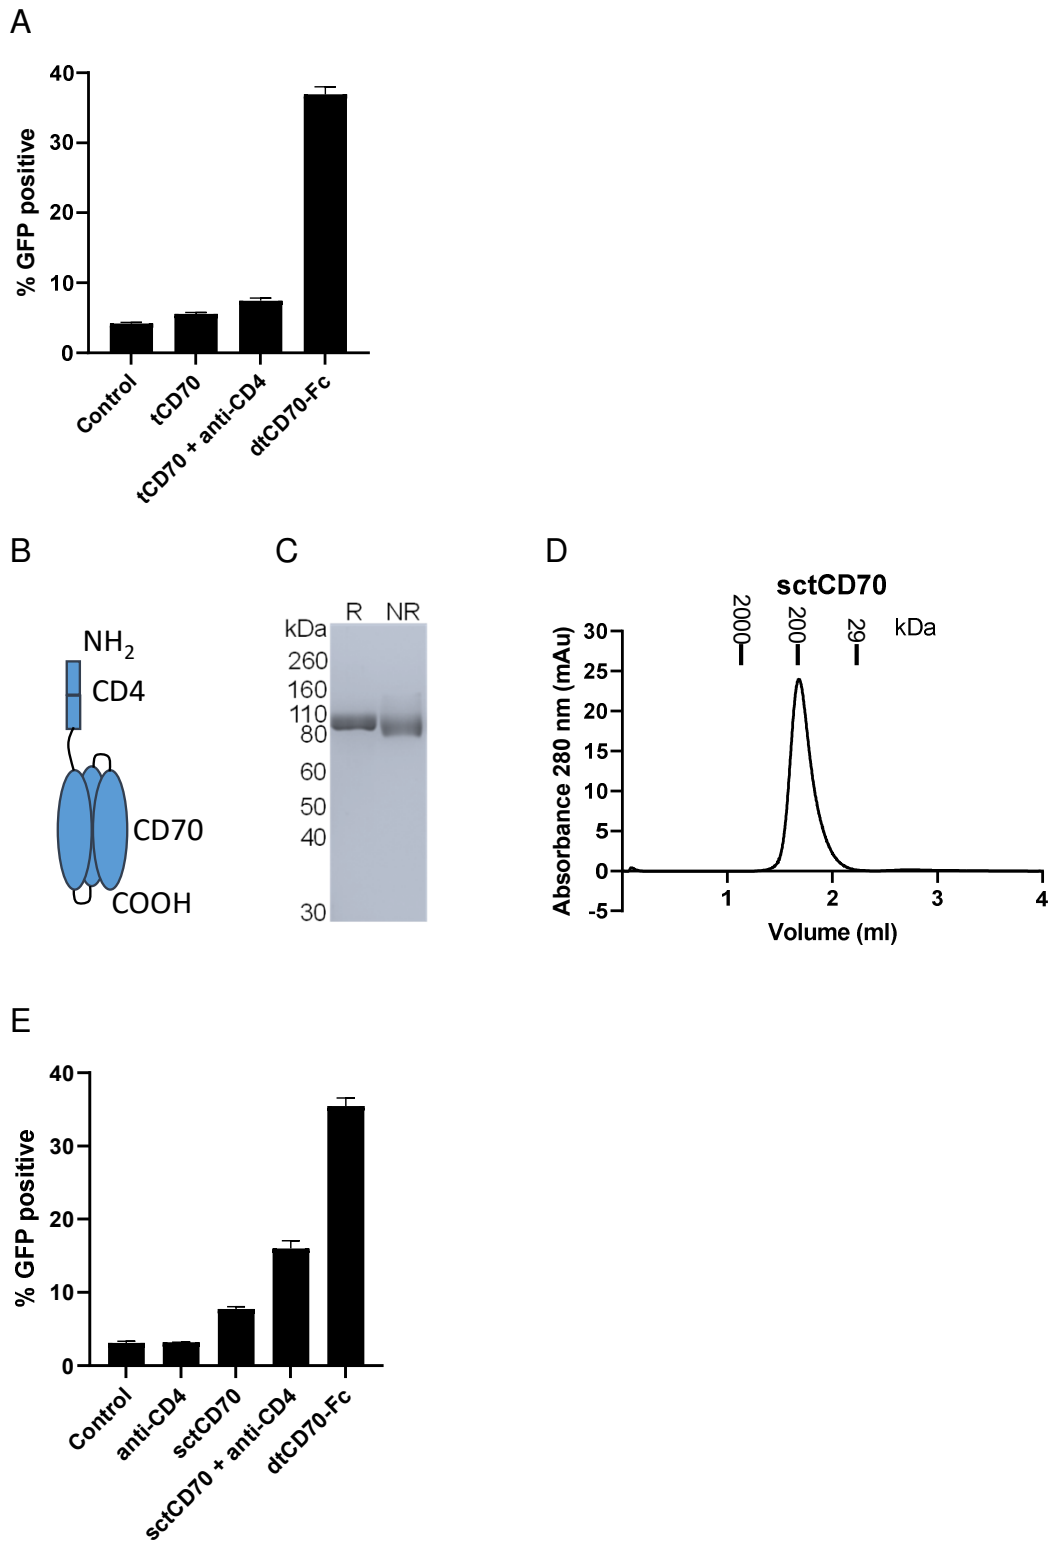

**SUPPLEMENTARY FIGURE 2.** Analysis of NF $\kappa$ B activation by CD70 fusion proteins. NF $\kappa$ B-GFP/mouse CD27<sup>+</sup> Jurkat reporter cells were stimulated with of indicated proteins for 6 hrs at 37 °C before being analysed for GFP expression by flow cytometry. (A) The effect of tCD70 crosslinking using anti-CD4 on NF $\kappa$ B activation. (B) Schematic of the sctCD70 structure. (C and D) SDS-PAGE under reducing (R) and non-reducing (NR) conditions (C) and analytical SEC profile of sctCD70 protein (D). (E) The effect of sctCD70 crosslinking using anti-CD4 on NF $\kappa$ B activation. Data shown are the mean  $\pm$  SD. Controls were irrelevant mIgG1 in (A) and Jurkat reporter cells alone in (E).
