# Supplementary material for: Fcγ receptor binding is required for maximal immunostimulation by CD70-Fc
Source: PubMed Central journal article supplement (PMC10641686; doi:10.3389/fimmu.2023.1252274), 2023-10-27
Supplement: DataSheet_4.pdf [file DataSheet_4.pdf]

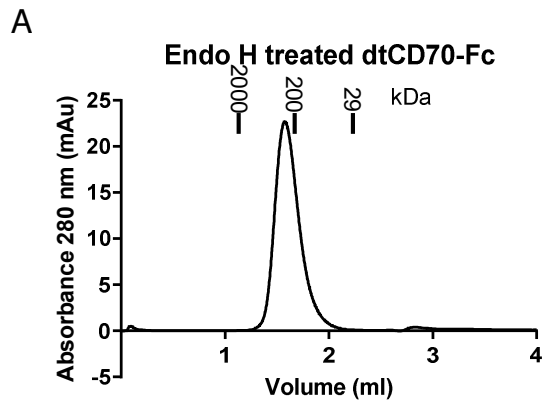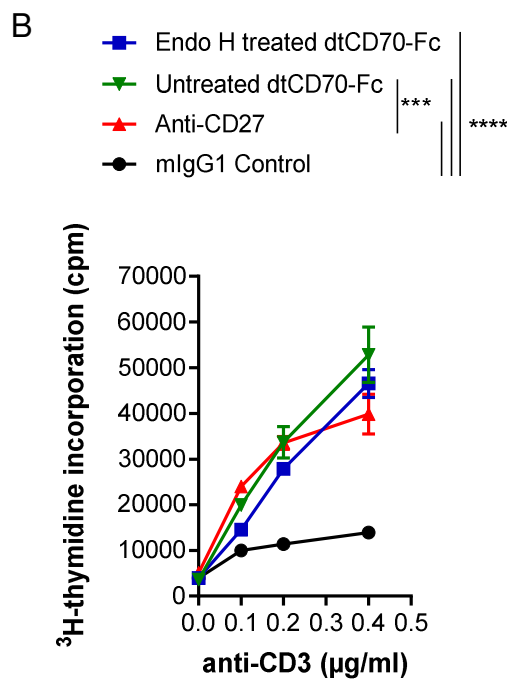

**SUPPLEMENTARY FIGURE 4.** Characterisation and in vitro activity of dtCD70-Fc following Endo H treatment. (A). Analytical SEC elution profile of Endo H treated dtCD70-Fc. (B) Endo H treated dtCD70-Fc exerts costimulatory effects similar to untreated dtCD70-Fc. Splenocytes were stimulated for 72 h with various concentrations of soluble anti-CD3 and the indicated proteins (10  $\mu\text{g/ml}$ ). Proliferation of T cells as assessed by measurement of [ $^3\text{H}$ ]-thymidine incorporation. Data points represent the mean of triplicate measurements  $\pm$  SE and the data are representative of two independent experiments. Statistical comparisons at the highest anti-CD3 concentration are indicated. \*\*\*  $P < 0.001$ , \*\*\*\*  $P < 0.0001$ , two-way ANOVA with Tukey's multiple comparison test.
