# Supplementary material for: Fcγ receptor binding is required for maximal immunostimulation by CD70-Fc
Source: PubMed Central journal article supplement (PMC10641686; doi:10.3389/fimmu.2023.1252274), 2023-10-27
Supplement: DataSheet_5.pdf [file DataSheet_5.pdf]

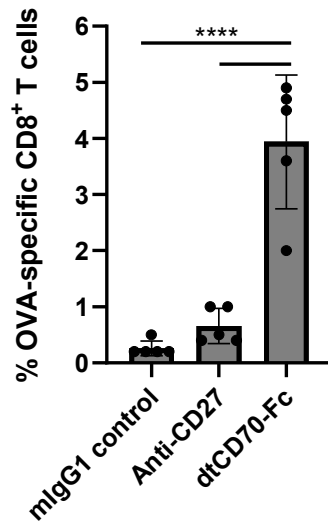

**SUPPLEMENTARY FIGURE 5.** Analysis of endogenous OVA<sub>257-264</sub> specific CD8<sup>+</sup> T cell response. Mice were injected i.v. with OVA protein (5 mg) in combination with mIgG1 control, anti-CD27 or Endo H treated dtCD70-Fc (250 μg) on day 0. Mice received 2 further injections of mIgG1/anti-CD27/dtCD70-Fc on days 1 and 2. The percentages of OVA<sub>257-264</sub> specific CD8<sup>+</sup> T cells out of total CD8<sup>+</sup> T cells were determined in blood on day 7 by tetramer staining and flow cytometry. Data shown represent mean +/- SD (n=5 mice/group). \*\*\*\* P < 0.0001, one-way ANOVA with Tukey's multiple comparisons test.
