# Supplementary material for: Fcγ receptor binding is required for maximal immunostimulation by CD70-Fc
Source: PubMed Central journal article supplement (PMC10641686; doi:10.3389/fimmu.2023.1252274), 2023-10-27
Supplement: DataSheet_6.pdf [file DataSheet_6.pdf]

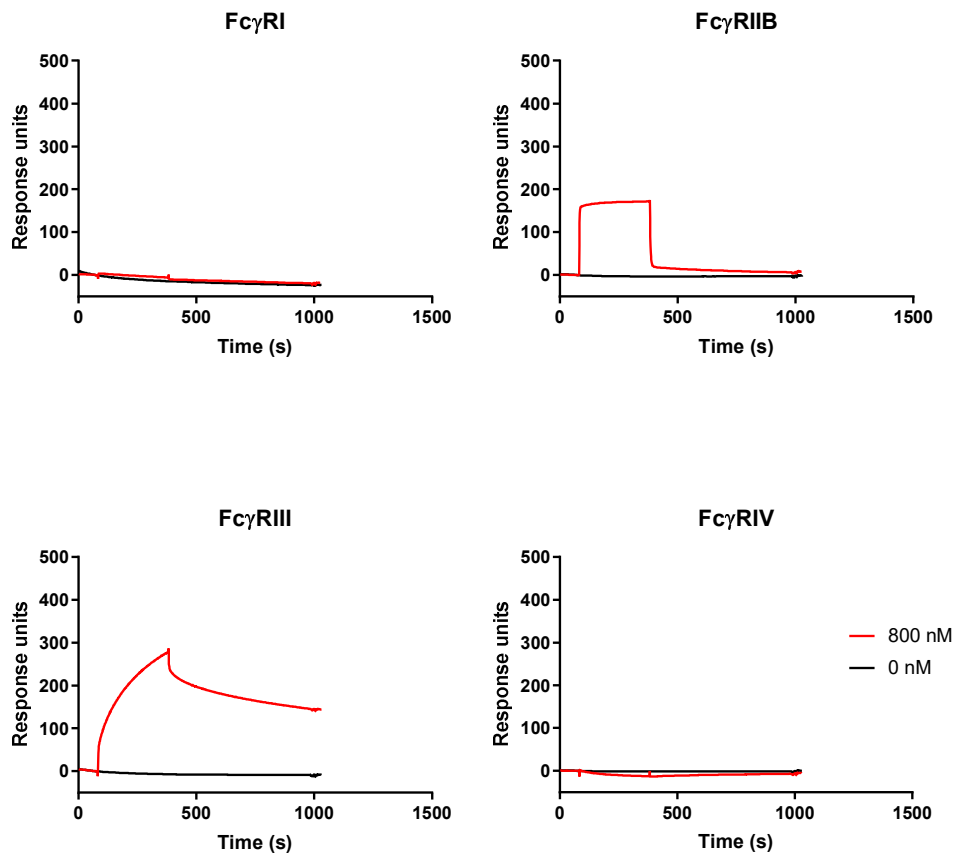

**SUPPLEMENTARY FIGURE 6.** SPR analysis of the binding of Endo H treated dtCD70-Fc to FcγRs. Soluble recombinant FcγRs (800 nM) were injected over immobilised Endo H treated dtCD70-Fc (~3000 RU) for 5 mins at a flow rate of 30  $\mu$ l/min. Sensograms show measurable binding to FcγRIIB and FcγRIII, consistent with the binding specificity of mIgG1 Fc.
