# Supplementary material for: Fcγ receptor binding is required for maximal immunostimulation by CD70-Fc
Source: PubMed Central journal article supplement (PMC10641686; doi:10.3389/fimmu.2023.1252274), 2023-10-27
Supplement: DataSheet_7.pdf [file DataSheet_7.pdf]

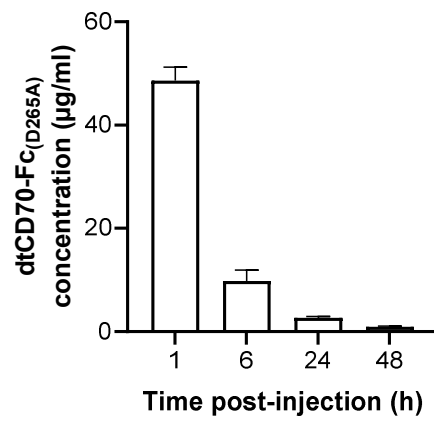

**SUPPLEMENTARY FIGURE 7.** The concentrations of dtCD70-Fc<sub>(D265A)</sub> in serum samples (n = 3) were measured by ELISA at the indicated intervals following i.v. injection (250 µg).
