# Supplementary material for: Fcγ receptor binding is required for maximal immunostimulation by CD70-Fc
Source: PubMed Central journal article supplement (PMC10641686; doi:10.3389/fimmu.2023.1252274), 2023-10-27
Supplement: DataSheet_8.pdf [file DataSheet_8.pdf]

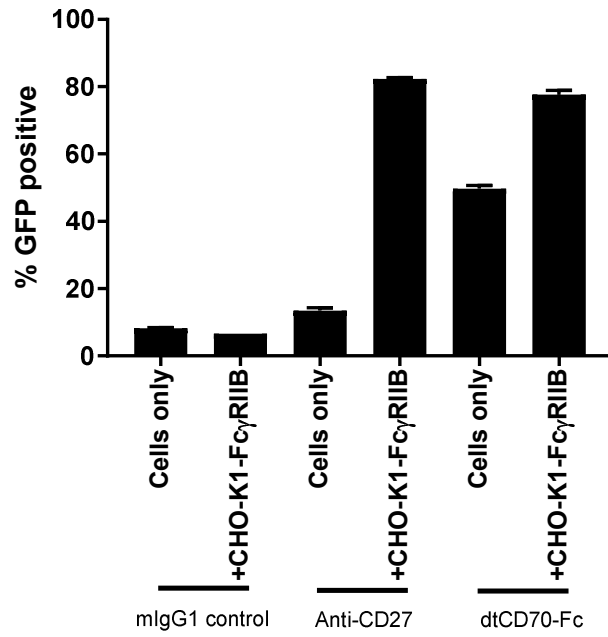

**SUPPLEMENTARY FIGURE 8.** Crosslinking of anti-CD27 and dtCD70-Fc by Fc $\gamma$ RIIB promotes their activity. NF $\kappa$ B-GFP/mouse CD27<sup>+</sup> Jurkat reporter cells were stimulated with indicated proteins without (cells only) or in the presence of CHO-K1 cells that express mouse Fc $\gamma$ RIIB for 6 hrs at 37 °C before being analysed for GFP expression by flow cytometry. Data shown are the mean +/- SD.
